# Supplementary material
Source: publisher figshare collection journal article supplement (https://frontiersin.figshare.com/ndownloader/files/14639672)
Supplement: Supplementary file 1 [file 14639672]

## *Appendix A.5*

### **Translating scientific articles to the non-scientific public using the Wikipedia Encyclopedia**

**Julien Leuthold\*, Adrian Gilli**

**\* Correspondence:**

Dr. Julien Leuthold: [julien.leuthold@gmail.com](mailto:julien.leuthold@gmail.com), [julien.leuthold@erdw.ethz.ch](mailto:julien.leuthold@erdw.ethz.ch)

#### **Teaching method evaluation: Creation of a Wikipedia page**

In Fall Semester 2017, you have attended the Heat and Mass Transfers in Magmatology course, taught by Julien Leuthold. By group of two, you had to read and present one scientific paper to the class and answer questions asked by other students. At the end of the semester, you were asked to create a new Wikipedia page about the topic treated in your article and review other students Wikipedia pages. The list of topics was:

- Lower oceanic crust
- Experimental petrology
- Deep Crustal Hot Zone
- Torres del Paine sill complex
- Kilauea Iki lava lake

This Wikipedia project was part of an ETH teaching project. I would greatly benefit of your evaluation and comments, for future improvements and extension of this teaching method to other courses. Please, take a few minutes to evaluate the Wikipedia page creation.



**The Wikipedia exercise:**

6. I have already used Wikipedia Encyclopedia during my studies...:

| frequently | sometimes | rarely | never |
|------------|-----------|--------|-------|
|            |           |        |       |

7. ...Because I think the Wikipedia Encyclopedia is:

| Accessible and easy | Incomplete | Full of errors | Other (give details) |
|---------------------|------------|----------------|----------------------|
|                     |            |                |                      |

8. In the past, I have already been involved in scientific communications to the public:

| frequently | sometimes | rarely | never |
|------------|-----------|--------|-------|
|            |           |        |       |

9. It was clear what I should do during the Wikipedia exercise:

|  |  |  |  |
|-----------------------------------------------------------------------------------|-----------------------------------------------------------------------------------|-----------------------------------------------------------------------------------|-------------------------------------------------------------------------------------|
|                                                                                   |                                                                                   |                                                                                   |                                                                                     |

10. It was challenging to 'translate' a scientific article to a large public Wikipedia page:

|  |  |  |  |
|-----------------------------------------------------------------------------------|-----------------------------------------------------------------------------------|-----------------------------------------------------------------------------------|-------------------------------------------------------------------------------------|
|                                                                                   |                                                                                   |                                                                                   |                                                                                     |

11. I have made updates and changes to the sub-topics written by my colleagues:

| ≥10 | ≥5 | ≥2 | 1 | 0 |
|-----|----|----|---|---|
|     |    |    |   |   |

12. Generally, I enjoyed creating a Wikipedia page:

|  |  |  |  |
|-------------------------------------------------------------------------------------|-------------------------------------------------------------------------------------|-------------------------------------------------------------------------------------|---------------------------------------------------------------------------------------|
|                                                                                     |                                                                                     |                                                                                     |                                                                                       |

13. I will continue writing and updating Wikipedia pages in the future:

|  |  |  |  |
|-------------------------------------------------------------------------------------|-------------------------------------------------------------------------------------|-------------------------------------------------------------------------------------|---------------------------------------------------------------------------------------|
|                                                                                     |                                                                                     |                                                                                     |                                                                                       |

Briefly explain which communication skills you newly learned/extended while writing the new Wikipedia page:

| newly learned | extended |
|---------------|----------|
|               |          |
